# Supplementary material for: Use of QSAR Global Models and Molecular Docking for Developing New Inhibitors of c-Src Tyrosine Kinase
Source: Preprints.org preprint supplement (doi:10.20944/preprints201910.0113.v1), 2019-10-10
Supplement: Supplementary file 1 [file Table_SI.Src_virtual_screening_results_threshold_75p_no_duplicates.xlsx]

## Sheet: Src_rezultate_virtual_screening
Zinc code	Substance_name	Confirmation in bioassays ?	In_training_set	RF_1	RF_2	RF_3	RF_7	RF_9	RF_10	RF_11	RF_12	RF_13	RF_17	SVM1	SVM2	SVM3	SVM4	SVM5	SVM6	SVM7	SVM8	SVM9	SVM10	SVM11	SVM12	SVM13	SVM14	SVM15	Adabm1_9	Adabm1_11	Adabm1_12	Adabm1_17	BartM_4	BartM_5	BartM_6	BartM_9	BartM_12	BartM_13	BartM_15	C50_1	C50_2	C50_3	C50_4	C50_5	C50_7	C50_8	C50_9	C50_10	C50_11
ZINC000034800095	Gw574783b	No (3.9% at 1 uM, 0.6% at 0.1 uM) Active on Yes 1, EGFR and ERBB4	Nu	A	A	A	A	A	A	A	A	A	A	A	A	A	A	A	A	A	A	A	A	A	A	A	A	A	A	A	A	A	A	A	A	A	A	A	A	A	A	A	A	A	A	A	A	A	A
ZINC000150528975	Vedroprevir	?	Nu	A	A	A	A	A	A	A	A	A	A	A	A	A	A	A	A	A	A	A	A	A	A	A	I	A	A	A	A	A	A	A	A	A	A	A	A	A	A	A	A	A	A	A	A	A	A
ZINC000034800096	Gw583373a	No (6.34% at 1 uM, 1.76% at 0.1 uM). Active on Yes 1, EGFR and ERBB4	Nu	A	A	A	A	A	A	A	A	A	A	A	A	A	A	A	A	A	A	A	A	A	I	A	A	A	A	A	A	A	A	A	A	A	A	A	A	A	A	A	A	A	A	A	A	A	A
ZINC000034800093	Gw580496a	No (6.5-6.7%). Active on EGFR, ERBB2, and ERBB4	Nu	A	A	A	A	A	A	A	A	A	A	A	A	A	A	A	A	A	I	A	A	A	A	A	A	A	A	A	A	A	A	A	A	A	A	A	A	A	A	A	A	A	A	A	A	A	A
ZINC000042834394	Gsk200398a	No (-0.98% - 0.01%). Stated "active" on Yes1. Active on EGFR and ERBB4.	Nu	A	A	A	A	A	A	A	A	A	A	A	A	A	A	A	I	A	A	A	A	A	A	A	I	A	A	A	A	A	A	A	A	A	A	A	A	A	A	A	A	A	A	A	A	A	A
ZINC000044430703	Gsk300014a	No (10% at 0.1, 14% at 1 uM). Stated "active" on Yes1. Active on EGFR and ERBB4.	Nu	A	A	A	A	A	A	A	A	A	A	A	A	A	A	A	A	A	A	A	A	A	A	A	I	A	A	A	A	A	A	A	A	A	A	A	A	A	I	A	A	A	A	A	A	A	A
ZINC000072190218	Avatrombopag	?	Nu	A	A	A	A	A	A	A	A	A	A	I	A	A	A	A	A	A	A	A	A	A	I	A	A	A	A	A	A	A	A	A	A	A	A	A	A	A	A	A	A	A	A	A	A	A	A
ZINC000049678597	Pestalazine A	?	Nu	A	A	A	A	A	A	A	A	A	A	A	A	A	A	A	A	A	A	A	A	A	A	A	I	I	A	A	A	A	A	A	A	A	A	A	A	A	A	A	A	A	A	A	A	A	A
ZINC000011726212	Balamapimod	Yes	Nu	A	A	A	A	A	A	A	A	A	A	A	A	A	NA	A	A	A	A	A	A	A	A	A	I	A	A	A	A	I	A	A	A	A	A	A	A	A	A	A	A	A	A	A	A	A	A
ZINC000034800091	Gw576609a	No (8.56-10.17%). Reported as "active" on Yes1. Active on EGFR and ERBB4	Nu	A	A	A	A	A	A	A	A	A	A	A	A	A	NA	A	A	I	A	A	A	A	A	A	A	A	A	A	A	I	A	A	A	A	A	A	A	A	A	A	A	A	A	A	A	A	A
ZINC000034800083	Gw616030x	No (3.38%-4.01%). Active on EGFR and ERBB4	Nu	A	A	A	A	A	A	A	A	A	A	A	A	A	I	I	A	A	A	A	A	A	A	A	A	A	A	A	A	A	A	A	A	A	A	A	I	A	A	A	A	A	A	A	A	A	A
ZINC000068204830	Daclatasvir	?	Nu	A	A	A	A	A	A	A	A	A	A	A	A	A	A	A	A	I	A	A	A	A	A	I	I	A	A	A	A	A	A	A	A	A	A	A	A	A	A	A	A	A	A	A	A	A	A
ZINC000043195317	Golvatinib	No (>30 uM). Active on LCK	Nu	A	A	A	A	A	A	A	A	A	A	A	A	I	A	A	A	A	A	A	A	A	A	A	I	A	A	A	A	A	A	A	A	A	A	A	A	A	A	A	A	A	A	A	A	A	A
ZINC000044418656	Gw784684x	No (13.41%-18.34%). Active on Yes	Nu	A	A	A	A	A	A	A	A	A	A	A	A	A	A	A	A	I	A	A	A	I	I	A	A	A	A	A	A	A	A	A	A	A	A	A	A	A	A	A	A	A	A	A	A	A	A
ZINC000042804069	Gsk-182497a	No (3.86%-6.56%). Active on EGFR and ERBB4	Nu	A	A	A	A	A	A	A	A	A	A	A	A	I	A	A	A	A	A	A	A	I	A	A	A	I	A	A	A	A	A	A	A	A	A	A	A	A	A	A	A	A	A	A	A	A	A
ZINC000103297739	Defactinib	No. FAK inhibitor	Nu	A	A	A	A	A	A	A	A	A	A	A	A	A	A	A	A	A	A	A	A	A	A	A	A	A	A	A	A	A	A	A	A	A	A	A	A	A	A	A	A	I	A	I	A	I	A
ZINC000042834127	Gsk1751853a	No (4.53%-11.77%). Active on EGFR and ERBB4	Nu	A	A	A	A	A	A	A	A	A	A	A	A	I	A	A	A	A	A	A	A	A	A	I	I	A	A	A	A	A	A	A	A	A	A	A	A	A	A	A	A	A	A	A	A	A	A
ZINC000014945166	Gw830365a	No (4.5%-18.43%). Stated "active" on Yes1	Nu	A	A	A	A	A	A	A	A	A	A	A	A	A	A	A	A	A	A	A	A	A	A	A	A	I	I	A	A	I	A	A	A	A	A	A	A	A	A	A	A	A	I	A	A	A	A
ZINC000034800119	Gw576924a	No (8.51%-5.28%). Active on Yes 1, EGFR and ERBB4	Nu	A	A	A	A	A	A	A	A	A	A	A	A	A	A	A	A	I	A	A	I	I	I	A	A	A	A	A	A	A	A	A	A	A	A	A	A	A	A	A	A	A	A	A	A	A	A
ZINC000003938482	Posaconazole	?	Nu	A	A	A	A	A	A	A	A	A	A	A	A	I	A	A	I	A	A	A	A	A	I	A	I	A	A	A	A	A	A	A	A	A	A	A	A	A	A	A	A	A	A	A	A	A	A
ZINC000084758827	Becampanel	?	Nu	A	A	A	A	A	A	A	A	A	A	I	I	A	A	A	A	A	A	A	A	A	A	A	I	A	A	A	A	A	A	A	A	A	A	A	A	A	A	A	A	A	A	A	I	A	A
ZINC000042834162	Gw869810x	No (-0.25%, 11.35%). Active on EGFR and ERBB4	Nu	A	A	A	A	A	A	A	A	A	A	A	A	I	A	A	A	A	A	A	A	I	A	A	A	I	A	A	A	A	A	A	A	A	A	A	A	A	A	I	A	A	A	A	A	A	A
ZINC000004215255	Cefpimizole	?	Nu	A	A	A	A	A	A	A	A	A	A	A	A	A	A	A	A	I	I	A	A	A	A	A	A	A	A	A	A	A	A	A	A	I	A	A	A	A	A	A	A	A	A	A	I	A	A
ZINC000003938668	Pha-665752	No (IC50 = 6 uM). Active on LCK (ki=320 nM) and YES1 (ki=1400 nM)	Nu	A	A	A	A	A	A	A	A	A	A	A	A	I	A	A	A	I	A	I	A	A	A	A	I	A	A	A	A	A	A	A	A	A	A	A	A	A	A	A	A	A	A	A	A	A	A
ZINC000003925087	Gw806742x	Yes (86.65% at 1 uM)	Nu	A	A	A	A	A	A	A	A	A	A	A	A	A	A	A	A	A	I	A	A	A	A	A	A	A	I	A	A	A	A	A	A	I	A	A	A	A	A	A	A	A	A	A	I	A	A
ZINC000150339466	Ciluprevir	?	Nu	A	A	A	A	A	A	A	A	A	A	I	A	A	A	A	A	I	I	A	A	A	A	A	I	A	A	A	A	A	A	A	A	A	A	A	A	A	A	A	A	A	A	A	A	A	A
ZINC000044404239	Gsk238063a	No (3.94% at 1 uM). Active on EGFR and ERBB4	Nu	A	A	A	A	A	A	A	A	A	A	A	A	I	NA	A	A	A	A	A	A	I	A	A	A	I	A	A	A	I	A	A	A	A	A	A	A	A	A	A	A	A	A	A	A	A	A
ZINC000072122048	Gsk259178a	No (8.86% at 1 uM). Active on EGFR and ERBB4	Nu	A	A	A	A	A	A	A	A	A	A	A	A	A	NA	A	A	A	A	I	A	A	A	A	I	A	A	A	A	I	A	A	A	A	A	A	A	A	A	I	A	A	A	A	A	A	A
ZINC000042806617	Gsk-192082a	No (6.91% at 1uM). Active on EGFR and ERBB4	Nu	A	A	A	A	A	A	A	A	A	A	A	A	I	NA	A	A	A	A	A	A	I	A	A	A	I	A	A	A	I	A	A	A	A	A	A	A	A	A	A	A	A	A	A	A	A	A
ZINC000028712569	Itraconazole	?	Nu	A	A	A	A	A	A	A	A	A	A	A	A	I	A	A	I	A	A	A	A	A	I	A	I	A	A	A	A	A	A	A	A	A	A	A	A	A	A	A	A	A	A	A	A	A	I
ZINC000042201866	Gw566221a	No (8.85%-10.94%). Stated "active" on Yes, EGFR and ERBB4	Nu	A	A	A	A	A	A	A	A	A	A	A	A	A	I	I	A	I	A	A	I	A	A	A	A	A	A	A	A	A	A	A	A	A	A	A	A	A	A	A	A	A	A	A	A	I	A
ZINC000014945171	Gw830263a	Yes (42.23% at 1 uM). Stated "active" on Yes	Nu	A	A	A	A	A	A	A	A	A	A	A	A	A	A	A	I	A	A	A	A	A	A	A	A	A	I	A	A	A	A	A	A	I	A	A	A	A	A	A	I	I	A	A	A	A	A
ZINC000019862646	Fedratinib	Yes	Nu	A	A	A	A	A	A	A	A	A	A	A	A	A	A	A	A	A	A	A	A	A	A	A	A	A	I	I	I	A	A	A	A	A	A	A	A	A	A	A	I	A	A	A	I	A	A
ZINC000008214659	Piroxicillin	?	Nu	A	A	A	A	A	A	A	A	A	A	A	A	I	A	A	A	A	I	A	A	A	A	A	I	A	A	A	A	A	A	A	A	I	A	A	A	A	A	A	A	A	A	A	I	A	A
ZINC000049709569	Asperazine	?	Nu	A	A	A	A	A	A	A	A	A	A	A	A	A	A	A	I	A	A	A	A	A	A	A	I	I	A	A	A	A	A	A	A	A	A	A	A	A	A	A	I	I	A	A	A	A	A
ZINC000040913833	Gw693881a	No (3.22% - 6.79%). Active on EGFR and ERBB4	Nu	A	A	A	A	A	A	A	A	A	A	A	A	I	A	A	A	A	A	A	I	I	A	A	I	A	A	A	A	A	A	A	A	A	A	A	A	A	A	A	A	A	A	A	A	A	A
ZINC000096928979	Deleobuvir	?	Nu	A	A	A	A	A	A	A	A	A	A	A	A	A	A	A	A	I	A	A	A	A	A	A	I	A	A	A	A	A	A	A	A	A	A	A	A	A	A	A	A	I	A	A	I	A	A
ZINC000042201868	Gw568377a	No (3.56 - 4.6%). Stated "active" on Yes, EGFR, ERBB4	Nu	A	A	A	A	A	A	A	A	A	A	A	I	A	I	I	A	I	A	A	A	A	A	A	A	A	A	A	A	A	A	A	A	A	A	A	A	A	A	A	A	A	A	A	A	I	A
ZINC000014945147	Gw809897x	Yes (65.38% at 1 uM)	Nu	A	A	A	A	A	A	A	A	A	A	A	A	I	NA	A	A	A	I	I	A	A	A	A	A	A	A	A	A	I	A	A	A	A	A	A	A	A	A	A	A	A	A	I	A	A	A
ZINC000004194719	Sulfamazone	?	Nu	A	A	A	A	A	A	A	A	A	A	A	A	A	A	I	A	I	A	I	A	I	I	A	A	A	A	A	A	A	A	A	A	A	A	A	A	A	A	A	A	A	A	A	I	A	A
ZINC000003986669	Bx-795	Yes (27-30% inhibition on human src, 77%-90% on Gallus gallus src), active on Yes1 (	Nu	A	A	A	A	A	A	A	A	A	A	A	A	A	A	A	A	I	A	A	A	A	A	I	I	I	A	A	A	A	A	A	A	A	A	A	A	A	I	A	A	A	A	A	A	I	A
ZINC000002007399	Gw458787a	No. Active on Yes (42% inhibition at 1uM, 463 nM potency), EGFR and ERBB4	Nu	A	A	A	A	A	A	A	A	A	A	A	I	A	I	I	A	I	A	A	I	A	A	A	A	A	A	A	A	A	A	A	A	A	A	A	A	A	A	A	A	A	A	A	A	I	A
ZINC000095618749	Candesartan O-Glucuronide	?	Nu	A	A	A	A	A	A	A	A	A	A	A	A	A	A	A	A	I	I	A	A	I	A	A	I	A	A	A	A	A	A	A	A	A	A	A	A	A	A	A	A	A	A	A	I	A	I
ZINC000003930603	Sch-49999	?	Nu	A	A	A	A	A	A	A	A	A	A	A	A	I	A	A	I	A	A	A	A	A	I	A	I	A	A	A	A	A	A	A	A	A	A	A	A	A	A	A	A	A	A	A	I	A	I
ZINC000003604326	Vaneprim	?	Nu	A	A	A	A	A	A	A	A	A	A	A	A	A	A	A	A	A	A	I	I	I	A	A	I	A	A	A	A	A	A	A	A	A	A	A	A	A	A	A	A	A	A	A	A	I	A
ZINC000034800110	Gw574782a	No (9.13-12.49%). Active on EGFR, ERBB1, ERBB2	Nu	A	A	A	A	A	A	A	A	A	A	A	I	A	I	I	A	I	A	A	A	A	A	I	A	A	A	A	A	A	A	A	A	A	A	A	A	A	I	A	A	A	A	A	A	A	A
ZINC000028111193	Pramiconazole	?	Nu	A	A	A	A	A	A	A	A	A	A	A	A	I	A	A	I	A	A	A	A	I	I	A	I	A	A	A	A	A	A	A	A	A	A	A	A	A	A	A	A	A	A	A	A	A	I
ZINC000098052868	Olcegepant	?	Nu	A	A	A	A	A	A	A	A	A	A	A	A	A	A	A	I	A	I	A	A	A	A	A	I	A	A	A	A	I	A	A	A	A	A	A	A	A	A	A	A	A	A	A	I	A	A
ZINC000014945045	Gw569530a	No (6.29-7.64%). Inconclusive on Yes1, active on EGFR	Nu	A	A	A	A	A	A	A	A	A	A	A	A	A	A	I	A	A	A	A	A	A	A	A	I	A	I	A	A	A	A	A	A	A	A	A	A	A	A	A	A	A	A	I	A	I	A
ZINC000014965596	Gw683134a	Yes (36.99% at 1 uM). Active on LYN and Yes1	Nu	A	A	A	A	A	A	A	A	A	A	A	A	I	A	A	A	I	I	A	A	A	I	A	I	A	A	A	A	A	A	A	A	A	A	A	A	A	A	A	A	A	A	A	A	A	A
ZINC000003995140	Gw621823a	No (3.8% - 6.22%). Active pe Yes1, EGFR, ERBB1, ERBB2, ERBB4	Nu	A	A	A	A	A	A	A	A	A	A	A	I	A	I	I	A	I	A	A	A	A	I	I	A	A	A	A	A	A	A	A	A	A	A	A	A	A	A	A	A	A	A	A	A	A	A
ZINC000040379218	Gw684626b	No (2.7%) at 1 uM. Inconclusive on Yes 1. Active on EGFR	Nu	A	A	A	A	A	A	A	A	A	A	A	A	A	A	A	A	A	A	A	A	I	A	A	A	I	A	A	A	A	A	A	A	A	A	A	A	I	I	A	I	I	A	A	A	A	A
ZINC000034800121	Gw567808a	No (15.81% at 1 uM). Active on EGFR, ERBB1, ERBB2	Nu	A	A	A	A	A	A	A	A	A	A	A	I	A	I	I	A	I	A	A	A	A	A	A	A	A	I	A	A	A	A	A	A	I	A	A	A	A	I	A	A	A	A	A	A	A	A
ZINC000034800112	Gw576484x	No (8.28% at 1 uM). Active on ERBB1	Nu	A	A	A	A	A	A	A	A	A	A	A	I	A	A	I	A	I	I	A	I	A	A	A	A	A	A	A	A	A	A	A	A	A	A	A	A	A	I	A	I	A	A	A	A	A	A
ZINC000150377731	Bms-247243	?	Nu	A	A	A	A	A	A	A	A	A	A	A	A	A	A	A	A	I	I	I	A	I	A	A	A	A	A	A	A	I	A	A	A	A	A	A	A	A	A	A	A	A	A	I	I	A	A
ZINC000043204048	Foretinib	Yes (ki= 20nM)	Nu	A	A	A	A	A	A	A	A	A	A	A	I	I	A	A	I	I	A	A	A	A	I	A	A	A	A	A	A	A	A	A	A	A	I	A	A	A	A	A	A	A	A	A	A	A	A
ZINC000150338819	Ledipasvir	?	Nu	A	A	I	A	A	A	A	A	A	A	A	A	A	I	I	I	A	A	A	A	A	A	I	I	A	A	A	A	A	A	A	A	I	A	A	A	A	A	A	A	A	A	A	A	A	A
ZINC000150574177	Purealin	?	Nu	A	A	A	A	A	A	A	A	A	A	I	I	I	A	A	I	A	I	A	A	A	A	A	A	A	A	A	A	I	A	A	A	A	A	A	A	A	A	A	A	A	A	A	A	A	A
ZINC000095615898	Tyrokeradine A	?	Nu	A	A	A	A	A	A	A	A	A	A	A	A	A	A	A	A	A	A	A	I	A	A	A	I	A	I	A	A	A	A	A	A	I	A	A	A	A	A	A	A	A	A	A	I	A	A
ZINC000169291484	Scleritodermin A	?	Nu	A	A	A	A	A	A	A	A	A	A	I	I	A	A	A	A	A	I	A	I	A	A	I	I	I	A	A	A	A	A	A	A	A	A	A	A	I	A	A	A	A	A	A	A	A	A
ZINC000003919988	L-766892	?	Nu	A	A	A	A	A	A	A	A	A	A	A	A	I	A	A	A	I	A	I	A	A	I	A	I	A	A	A	A	A	A	A	A	A	A	A	A	A	I	I	A	A	A	A	A	A	A
ZINC000103213128	Heptamethylene 1,7-Bis-Imadacloprid		Nu	A	A	A	A	A	A	A	A	A	A	A	A	I	A	A	I	A	I	A	I	I	I	I	I	A	A	A	A	A	A	A	A	A	A	A	A	A	A	A	A	A	A	A	A	A	A
ZINC000169306513	Hydroxyitraconazole	?	Nu	A	A	A	A	A	A	A	A	A	A	A	A	I	I	I	I	A	A	A	A	A	I	A	I	A	A	A	A	A	A	A	A	A	A	A	A	A	A	A	A	A	I	A	A	A	I
ZINC000028249631	Pd-170292	?	Nu	A	A	A	A	A	A	A	A	A	A	A	A	A	A	A	A	A	A	A	I	A	A	A	I	A	A	A	A	A	A	A	I	I	A	A	A	A	A	A	I	I	A	A	I	I	A
ZINC000042834949	Gsk-718429a	No (6.43% at 1 uM), active on Yes1 and ERBB4	Nu	A	A	A	A	A	A	A	A	A	A	I	I	I	A	A	A	I	A	A	A	A	A	A	I	A	A	A	A	A	A	A	A	A	A	A	A	I	A	I	A	A	A	A	A	I	A
ZINC000001481922	Setipafant	?	Nu	A	A	A	A	A	A	A	A	A	A	A	A	A	A	A	A	A	I	A	A	I	A	A	I	A	A	A	A	A	A	I	A	A	A	A	I	A	A	A	A	I	I	A	A	A	I
ZINC000169366333	Porphyrin	?	Nu	A	A	I	A	A	A	A	A	A	A	I	I	I	A	A	A	I	I	A	A	A	A	A	I	A	A	A	A	A	A	A	A	A	A	A	I	A	A	A	A	A	A	A	A	A	A
ZINC000150339145	Faldaprevir	?	Nu	A	A	A	A	A	A	A	A	A	A	I	I	I	A	A	A	I	A	A	A	A	I	I	I	I	A	A	A	A	A	A	A	A	A	A	A	A	A	A	A	A	A	A	A	A	A
ZINC000040404350	Gsk-969786a	No (6.58%). Active on EGFR and ERBB4	Nu	A	A	A	A	A	A	A	A	A	I	A	A	A	NA	A	A	A	A	A	A	I	A	A	I	A	A	A	A	I	A	A	A	A	A	A	A	A	I	I	I	I	A	A	A	A	A
ZINC000043131420	Fostamatinib	?	Nu	A	A	A	A	A	A	A	A	A	A	A	A	A	I	I	A	A	I	I	I	A	A	I	A	A	A	A	A	A	A	A	A	I	I	A	A	A	A	A	A	A	A	A	A	A	A
ZINC000095535868	Rwj-58259	?	Nu	A	A	A	A	A	A	A	A	A	A	I	I	I	A	A	A	I	I	A	A	A	A	A	I	I	A	A	A	A	A	A	A	A	A	A	A	A	A	A	I	I	A	A	A	A	A
ZINC000003994828	Brecanavir	?	Nu	A	A	A	A	A	A	A	A	A	A	I	I	I	I	I	I	I	I	A	A	I	A	A	A	A	A	A	A	A	A	A	A	A	A	A	A	A	A	A	A	A	A	A	A	A	A
ZINC000003842798	Darapladib	?	Nu	A	A	A	A	A	A	A	A	A	A	I	I	I	A	A	A	I	A	I	A	I	A	A	I	A	A	A	A	A	A	A	A	A	A	A	I	A	A	A	A	A	A	A	A	A	A
ZINC000100057121	Tegobuvir	?	Nu	I	A	A	A	A	A	A	A	A	I	A	A	I	A	A	A	A	I	A	A	I	A	A	A	I	A	I	A	I	A	A	A	A	A	A	A	A	A	A	A	A	A	A	A	A	A
ZINC000150339966	Afeletecan	?	Nu	A	A	A	A	A	A	A	A	A	A	I	I	A	A	A	A	A	I	A	A	A	A	A	I	A	I	A	A	A	A	A	A	I	A	A	A	I	A	A	A	A	I	A	A	I	A
ZINC000150588351	Elbasvir	?	Nu	A	A	A	A	A	A	A	A	A	A	A	A	A	I	I	I	A	I	A	A	A	A	A	I	A	A	A	A	A	A	A	A	I	A	A	A	A	A	A	I	I	A	A	A	A	I
ZINC000150601177	Ombitasvir	?	Nu	A	A	A	A	A	A	A	A	A	A	I	I	I	A	A	A	I	A	A	A	A	A	A	I	I	A	A	A	A	A	A	A	A	A	A	I	A	A	A	I	I	A	A	A	A	A
ZINC000027639357	Pranlukast	?	Nu	A	A	A	A	A	A	A	A	A	A	A	A	A	A	A	A	A	I	A	A	I	A	A	I	A	I	I	I	I	A	A	I	A	A	A	A	I	A	A	A	A	A	A	A	I	A
ZINC000014965588	Gw709042a	No (11.2%). Inconclusive on Yes1. Active on ABL1, PDGFRA, and KIT	Nu	A	A	A	A	A	A	A	A	A	A	A	A	I	I	I	A	I	I	A	I	A	I	A	I	A	A	A	A	A	A	A	A	A	A	A	A	A	A	I	A	A	A	A	A	A	A
ZINC000014945164	GW830900A	No (14.39%). Active on Yes1, PDGFRB, KIT, Aurora-A, and Aurora-C	Nu	A	A	I	A	A	A	A	A	A	I	A	A	A	A	A	A	A	I	A	A	A	A	A	I	A	I	A	A	I	A	A	A	A	I	A	A	A	A	A	I	A	I	I	A	A	A
ZINC000003921862	Tallimustine	?	Nu	A	A	A	A	A	A	A	A	A	A	A	A	I	A	A	I	A	A	I	I	I	A	A	I	I	A	A	A	A	A	A	A	A	A	A	A	I	A	A	A	A	A	A	I	A	A
ZINC000150339775	Oximinoarylsulfonamide	?	Nu	A	A	A	A	A	A	A	A	A	A	I	I	A	I	I	I	I	I	A	A	I	A	A	A	I	A	A	A	A	A	A	A	A	A	A	A	A	A	A	A	I	A	A	A	A	A
ZINC000085537136	Barixibat	?	Nu	A	A	A	A	A	A	A	A	I	A	A	I	A	A	A	A	I	A	I	I	I	A	A	I	I	A	A	A	A	A	A	A	A	A	A	A	A	A	A	A	A	I	A	A	A	A
ZINC000003946578	Mitratapide	?	Nu	A	A	A	A	A	A	A	A	A	A	A	A	I	I	I	I	A	A	I	A	A	I	A	I	A	A	A	A	A	A	A	A	A	A	A	A	A	A	A	A	A	I	I	A	A	A
ZINC000103213125	Hexamethylene 1,6-Bis-Imadacloprid	?	Nu	A	A	A	A	A	A	A	A	A	A	A	A	I	A	A	I	A	I	I	I	I	I	I	I	A	A	A	A	A	A	A	A	A	A	A	A	A	A	A	A	A	A	A	A	A	I
ZINC000095544067	Ulithiacyclamide F	?	Nu	A	A	A	A	A	A	A	A	A	A	I	I	I	I	I	I	A	I	A	I	A	A	A	I	A	A	A	A	A	A	A	A	A	A	A	A	A	A	I	A	A	A	A	A	A	A
ZINC000095540677	Ulithiacyclamide G	?	Nu	A	A	A	A	A	A	A	A	A	A	I	I	I	I	I	I	A	I	A	I	A	A	A	I	A	A	A	A	A	A	A	A	A	A	A	A	A	A	I	A	A	A	A	A	A	A
ZINC000150339789	Cc-1065	?	Nu	A	A	A	A	A	A	A	A	A	A	A	A	A	A	A	A	A	I	A	A	I	A	A	I	A	I	I	I	I	A	A	I	A	A	A	A	I	A	A	A	A	A	A	A	I	A
ZINC000096006114	Beta-Dadf, Msa, Multisubstrate Adduct Inhibitor	?	Nu	A	A	A	A	A	A	A	A	A	A	I	I	A	A	A	I	I	I	A	I	A	A	I	I	I	A	A	A	A	A	A	A	A	A	A	A	I	A	A	A	A	A	A	A	A	A
ZINC000150362884	Pyropheophytin B	?	Nu	A	A	A	A	A	A	A	A	A	A	I	I	I	A	A	A	I	A	A	A	A	A	I	I	A	A	A	A	A	I	A	I	I	A	I	A	A	A	I	A	A	A	A	A	A	A
ZINC000013831338	Anilinopyrimidine1	Yes (56% at 1 uM)	Nu	I	I	I	I	A	A	A	A	A	I	A	A	A	A	A	A	A	A	A	A	A	A	A	I	I	A	A	A	A	A	A	A	A	A	A	A	A	A	I	A	I	I	A	A	A	A
ZINC000006717126	Quarfloxin	?	Nu	A	A	A	A	A	A	A	A	A	A	I	I	A	A	A	A	I	I	I	A	A	A	A	I	A	I	A	A	A	A	A	A	I	A	A	A	A	A	A	A	I	A	I	I	A	A
ZINC000150609364	Pseudoceratinazole A	?	Nu	A	A	A	A	A	A	A	A	A	A	A	I	I	A	A	A	A	I	I	I	A	I	A	A	A	A	A	A	A	A	A	A	A	A	A	A	A	A	I	A	A	A	A	A	I	A
ZINC000077301904	Losartan N2-Glucuronide	?	Nu	A	A	A	A	A	A	A	A	A	I	A	A	A	A	A	A	A	I	A	A	A	A	A	I	A	I	I	I	I	A	A	A	A	A	I	A	A	A	A	I	A	I	A	A	A	A
ZINC000085537129	Penimocycline	?	Nu	A	A	A	A	A	A	A	A	A	A	I	I	A	A	A	A	I	I	A	I	A	A	A	I	A	I	A	A	A	A	A	A	I	A	A	A	A	A	A	A	A	A	I	I	I	A
ZINC000003979512	Brostallicin	?	Nu	A	A	A	A	A	A	A	A	A	A	A	I	I	A	A	I	A	I	I	I	A	I	I	I	I	A	A	A	A	A	A	A	A	A	I	A	A	A	A	A	A	A	A	A	A	A
ZINC000095615076	Ulithiacyclamide B	?	Nu	A	A	I	A	A	A	A	A	A	A	I	I	I	I	I	I	A	I	A	I	A	A	A	I	A	A	A	A	A	A	A	A	A	A	A	A	A	A	A	A	A	I	A	A	A	A
ZINC000043204002	Quizartinib	No (binding affinity > 10 uM). Active on PDGFR, KIT, and FLT3	Nu	A	A	A	A	A	A	A	A	I	A	A	A	A	NA	A	A	A	A	A	A	A	A	I	I	A	A	I	A	I	A	A	A	A	A	A	A	I	I	A	A	A	I	I	A	A	I
ZINC000095555604	Wrenchnolol	?	Nu	A	A	A	A	I	A	A	A	A	A	A	A	I	A	A	A	I	A	I	A	I	I	A	I	A	A	A	A	A	A	A	A	I	A	A	A	A	A	A	I	I	A	A	I	I	A
ZINC000169291499	Kibdelomycin	?	Nu	A	A	A	A	A	A	A	A	A	A	I	I	I	A	A	I	I	I	I	I	I	A	A	I	I	A	A	A	A	A	A	A	A	A	A	A	A	A	A	A	A	A	A	A	I	A
ZINC000101677507	Dragmacidin D	?	Nu	A	A	A	A	I	A	A	A	A	A	A	A	I	I	I	I	A	A	A	A	I	A	I	A	I	A	A	A	A	A	A	A	I	A	A	A	A	A	A	A	A	A	A	I	A	I
ZINC000095535876	Rwj-54003	?	Nu	A	A	A	A	A	A	A	A	A	A	I	I	I	I	I	I	I	A	A	A	A	I	A	I	I	A	A	A	A	A	A	A	A	A	A	A	A	A	A	I	I	A	A	A	A	A
ZINC000095616246	Ulithiacyclamide E	?	Nu	A	A	A	A	A	A	A	A	A	A	I	I	I	I	I	I	A	I	I	I	A	A	A	I	A	A	A	A	A	A	A	A	A	A	A	A	A	A	I	A	A	I	A	A	A	A
ZINC000003944244	BMS-248360	?	Nu	A	A	I	A	A	A	A	A	A	A	I	I	I	I	I	A	I	A	A	A	A	A	A	I	I	A	A	A	A	A	A	I	A	A	I	A	A	A	A	A	A	I	A	A	A	A
ZINC000044307849	Plakortamine C	?	Nu	I	A	A	A	A	A	A	A	I	I	A	A	A	A	A	A	I	I	A	I	A	A	A	I	A	A	A	A	A	A	A	A	A	A	A	A	I	A	A	I	I	I	I	A	A	A
ZINC000004215707	Ditercalinium	?	Nu	A	A	A	A	A	A	A	A	A	A	A	A	A	I	I	I	I	A	A	A	A	I	A	I	A	A	A	A	A	A	A	A	I	A	A	A	A	A	I	I	I	I	A	A	I	A
ZINC000095615956	Ulithiacyclamide	?	Nu	A	A	A	A	A	A	A	A	A	A	I	I	I	I	I	I	I	I	I	I	A	A	A	I	A	A	A	A	A	A	A	A	A	A	A	A	A	A	A	A	A	I	A	A	A	A
ZINC000150592451	Micromide	?	Nu	A	A	A	A	A	A	A	A	A	I	A	A	I	A	A	A	A	A	I	I	A	I	A	I	I	A	A	A	I	I	A	I	A	A	A	A	A	A	A	A	A	A	A	I	A	A
ZINC000028109502	Lissoclinamide 3	?	Nu	A	A	A	A	A	A	A	A	A	A	I	I	I	I	I	I	I	I	I	I	A	I	A	I	A	A	A	A	A	A	A	A	A	A	A	A	A	A	A	A	A	A	A	A	A	A
ZINC000169292615	Ebiratide	?	Nu	A	A	A	A	A	A	A	A	A	A	A	A	I	I	I	I	A	A	A	A	A	A	A	A	A	A	A	A	I	I	A	I	A	A	A	I	A	I	A	A	I	A	A	I	A	A
ZINC000068151111	Narlaprevir	?	Nu	A	A	I	A	A	A	A	A	A	A	I	I	A	I	I	I	I	A	A	A	A	I	A	A	I	A	A	A	A	A	A	A	I	A	I	A	A	A	A	A	A	A	I	A	A	A
ZINC000028109537	Lissoclinamide 2	?	Nu	A	A	A	A	A	A	A	A	A	A	I	I	I	I	I	I	I	I	I	I	A	I	A	I	A	A	A	A	A	A	A	A	A	A	A	A	A	A	A	A	A	A	A	A	A	A
ZINC000029571072	Isavuconazonium	?	Nu	A	A	A	A	A	A	A	A	A	A	I	I	A	NA	I	I	I	I	A	A	A	I	A	I	I	A	A	A	I	A	A	A	A	A	A	A	I	I	A	A	A	A	A	A	A	A
ZINC000095615878	Patellamide F	?	Nu	A	A	A	A	A	A	A	A	A	A	I	I	I	NA	I	I	A	I	I	I	A	I	A	I	I	A	A	A	I	A	A	A	A	A	A	A	A	A	A	A	A	A	A	A	A	A
[truncated: 5 more columns]
